# Supplementary material for: Risk Factors for COVID-19 in Patients with Hypertension
Source: Hindawi journal article supplement (doi:10.1155/2021/5515941), 2021-05-07
Supplement: f1 [file 5515941.f1.pdf]

## Supplementary table

**Supplementary table 1.** Classification of office blood pressure and definitions of hypertension grades according to the 2018 guidelines of the European Society of Hypertension.

| Category                       | Systolic(mmHg) |        | Diastolic(mmHg) |
|--------------------------------|----------------|--------|-----------------|
| Optimal                        | <120           | and    | <80             |
| Normal                         | 120-129        | and/or | 80-84           |
| High normal                    | 130-139        | and/or | 85-89           |
| Grade 1 hypertension           | 140-159        | and/or | 90-99           |
| Grade 2 hypertension           | 160-179        | and/or | 100-109         |
| Grade 3 hypertension           | $\geq 180$     | and/or | $\geq 110$      |
| Isolated systolic hypertension | $\geq 140$     | and    | <90             |

**Supplementary table 2.**Reference range of laboratory findings.

|                                         | Reference range |
|-----------------------------------------|-----------------|
| White blood cell count, $\times 10^9/L$ | 3.5–9.5         |
| Neutrophil count, $\times 10^9/L$       | 1.8–6.3         |
| Monocyte count, $\times 10^9/L$         | 0.1–0.6         |
| Lymphocyte count, $\times 10^9/L$       | 1.1–3.2         |
| Hemoglobin, g/L                         | 130–175         |
| Platelet count, $\times 10^9/L$         | 125–350         |
| Eosinophil count, $\times 10^9/L$       | 0.02–0.52       |
| Basophils count, $\times 10^9/L$        | 0–0.06          |
| C-reactive protein, mg/L                | 0–4             |
| IL-6, pg/mL                             | < 7             |
| PCT, ng/mL                              | 0–0.05          |
| ALT, IU/L                               | 9–50            |
| AST, IU/L                               | 9–60            |
| Albumin, g/L                            | 40–55           |
| Total bilirubin, $\mu\text{mol/L}$      | 0–26            |
| $\gamma$ -glutamyl transferase, IU/L    | 10–60           |
| ALP, IU/L                               | 45–125          |
| Creatine kinase, IU/L                   | 50–310          |
| LDH, IU/L                               | 120–250         |
| CK-MB, IU/L                             | 0–24            |
| Myoglobin, ng/mL                        | 0–80            |
| Hypersensitive troponin I, ng/mL        | 0–0.04          |

|                               |           |
|-------------------------------|-----------|
| BNP, pg/mL                    | 0–100     |
| Creatinine, $\mu\text{mol/L}$ | 57–111    |
| Urea nitrogen, mmol/L         | 3.6–9.5   |
| UA, $\mu\text{mol/L}$         | 202–416   |
| D-dimer mg/L                  | 0–0.55    |
| PT, s                         | 9.2–15    |
| Na <sup>+</sup>               | 137–147   |
| Cl <sup>-</sup>               | 99–110    |
| K <sup>+</sup>                | 3.5–5.3   |
| Ca <sup>2+</sup>              | 2.11–2.52 |

**Supplementary table 3. Univariate logistic regression analysis of more severe patients with COVID-19 and hypertension**

|                                                | Univariate OR (CI 95%) | p value |
|------------------------------------------------|------------------------|---------|
| Diabetes                                       | 1.778(0.773-4.089)     | 0.176   |
| Coronary heart disease                         | 1.406(0.570-3.471)     | 0.46    |
| Cerebrovascular disease                        | 2.605(0.857-7.924)     | 0.092   |
| Percentage of PLV,%                            | 1.093(1.049-1.138)     | <0.001  |
| ARB or ACEI                                    | 0.299(0.097-0.923)     | 0.036   |
| Age, years                                     | 1.061(1.018-1.105)     | 0.005   |
| White blood cell count, $\times 10^9/\text{L}$ | 1.374(1.179-1.602)     | <0.001  |
| Neutrophil count, $\times 10^9/\text{L}$       | 1.632(1.343-1.984)     | <0.001  |
| Monocyte count, $\times 10^9/\text{L}$         | 0.634(0.223-1.803)     | 0.393   |
| Lymphocyte count, $\times 10^9/\text{L}$       | 0.1(0.038-0.259)       | <0.001  |
| Haemoglobin, g/L                               | 1.004(0.991-1.017)     | 0.544   |
| Platelet count, $\times 10^9/\text{L}$         | 0.995(0.991-0.999)     | 0.01    |
| Eosinophil count, $\times 10^9/\text{L}$       | 0(0-0.006)             | 0.001   |
| Basophils count, $10^9/\text{L}$               | 0(0-7.328)             | 0.067   |
| C-reactive protein, mg/L                       | 1.019(1.010-1.027)     | <0.001  |
| PCT, ng/ml                                     | 1.391 (1.071-1.806)    | 0.013   |
| ALT, IU/L                                      | 1.004(0.992-1.015)     | 0.512   |
| AST, IU/L                                      | 1.018(1.000-1.036)     | 0.047   |
| Albumin,g/L                                    | 0.759(0.679-0.848)     | <0.001  |
| Total bilirubin, $\mu\text{mol/L}$             | 1.051(0.985-1.120)     | 0.131   |
| $\gamma$ -glutamyltransferase,IU/L             | 1.005(0.998-1.012)     | 0.15    |
| ALP, IU/L                                      | 1.009(0.995-1.024)     | 0.19    |
| Creatine kinase, IU/L                          | 1.004(1.000-1.008)     | 0.084   |

|                                  |                     |        |
|----------------------------------|---------------------|--------|
| LDH,IU/L                         | 1.016(1.010-1.022)  | <0.001 |
| CK-MB,IU/L                       | 1.141(1.052-1.237)  | 0.001  |
| Myoglobin, ng/ml                 | 1.010(1.000-1.021)  | 0.05   |
| Hypersensitive troponin I, ng/ml | 0.809(0.368-1.781)  | 0.599  |
| BNP, pg/ml                       | 1(0.999-1.001)      | 0.754  |
| Creatinine, umol/L               | 0.999(0.994-1.0030) | 0.58   |
| Urea nitrogen, mmol/L            | 1.007 (0.969-1.046) | 0.737  |
| UA(uric acid), umol/L            | 0.998(0.994-1.001)  | 0.194  |
| D-dimer mg/L                     | 1.15 (1.024-1.292)  | 0.018  |
| PT , s                           | 1.507 (1.177-1.929) | 0.001  |
| Electrolyte, mmol/L              |                     |        |
| Na                               | 1.012 (0.975-1.050) | 0.529  |
| K                                | 1.337 (0.820-2.181) | 0.244  |
| Cl                               | 0.996 (0.974-1.018) | 0.691  |
| Ca                               | 0.042 (0.002-0.704) | 0.028  |
